# Supplementary material
Source: MDPI journal article supplement (https://www.mdpi.com/2073-4441/12/4/1219)
Supplement: s1 [file s1]

## Supplementary Material

**Table S1.** Characteristics of the water collected in for quantification of microplastics.

|                              | AVEIRO LAGOON | VOUGA RIVER |
|------------------------------|---------------|-------------|
| PH                           | 7.92          | 7.06        |
| DISSOLVED O <sub>2</sub> (%) | 32.4          | 38.9        |
| CONDUCTIVITY (MS)            | 43.41         | 288         |
| TOTAL DISSOLVED SOLIDS (PPT) | 21.70         | 145         |
| SALINITY (PSU)               | 28.04         | 0.14        |
| TEMPERATURE (°C)             | 16.45         | 20.33       |
| ATMOSPHERIC PRESSURE (PSI)   | 14.74         | 14.62       |

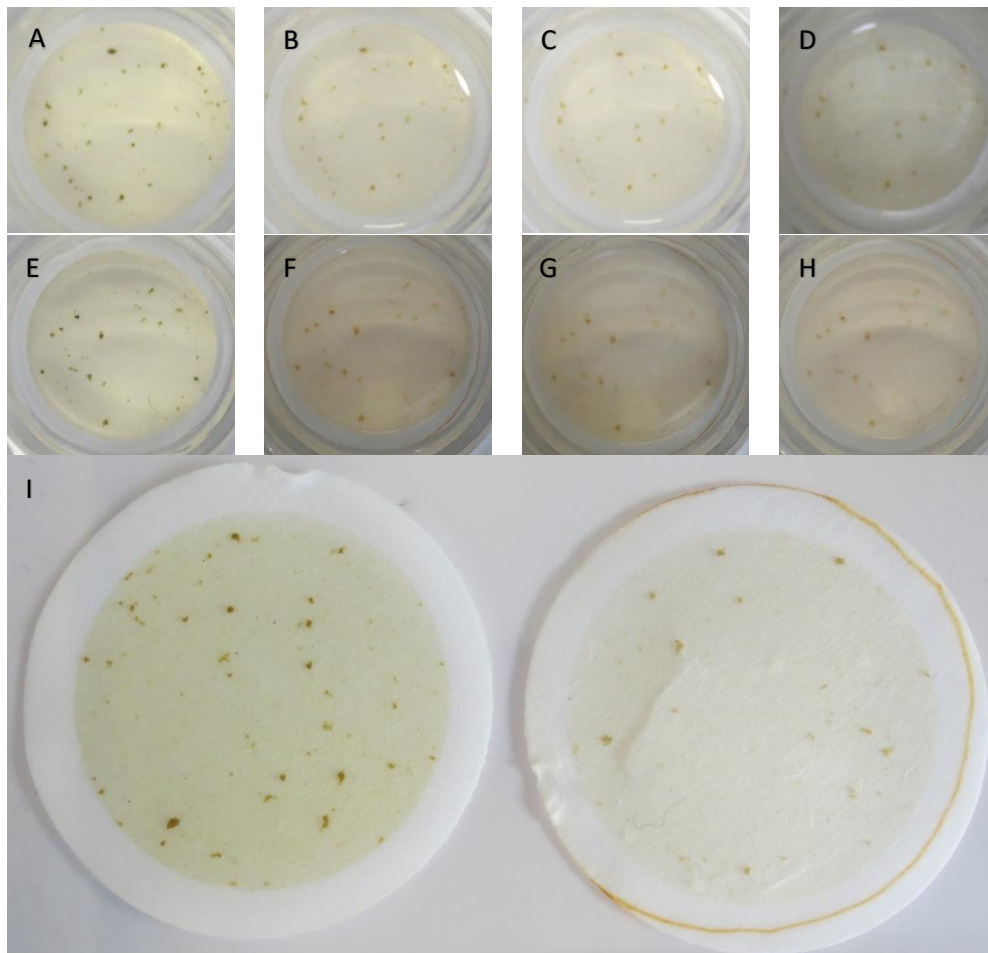

**Figure S1.** Testing the removal of natural organic matter from filters (50 mL from an artificial pond water) by adding 10 mL of H<sub>2</sub>O<sub>2</sub>, at 0 (A), 5 (B), 10 (C) and 15 (D) minutes, and H<sub>2</sub>O<sub>2</sub>+Fe, at 0 (E), 5 (F), 10 (G) and 15 (H) minutes, over the counter. Both filters exposed to H<sub>2</sub>O<sub>2</sub> (left) and H<sub>2</sub>O<sub>2</sub>+Fe (right) over the counter for 15 minutes (I).

$$IQR = \text{Quartile } 3 - \text{Quartile } 1$$

$$\text{Accuracy (\%)} = 100 \times \frac{(\text{Median} - \text{Nominal})}{\text{Nominal}}$$

$$CV (\%) = 100 \times \frac{\text{Standard Deviation}}{\text{Average}}$$

$$\text{Recovery (\%)} = 100 \times \text{Average}\left(\frac{\text{Value}_1}{\text{Nominal}}, \frac{\text{Value}_2}{\text{Nominal}}, \frac{\text{Value}_3}{\text{Nominal}}, \frac{\text{Value}_4}{\text{Nominal}}\right)$$

**Figure S2.** Formulas used in the calculation of the interquartile range (IQR), accuracy, coefficient of variation (CV), and recovery.

**Table S2.** Average, median, interquartile range (IQR), coefficient of variation (CV), accuracy and recovery of the concentration obtained from freshwater spikes in the concentrations of 2, 10 and 20 MP L<sup>-1</sup> depending on the volume sampled.

|              | <b>VOL (L)</b> | <b>2</b> | <b>10</b> | <b>20</b> |
|--------------|----------------|----------|-----------|-----------|
| Average      | 0.1            | 3        | 13        | 13        |
|              | 0.25           | 2        | 10        | 19        |
|              | 0.5            | 3        | 10        | 19        |
|              | 1              | 2        | 10        | 20        |
|              | 2.5            | 2        | 10        | 21        |
| Median       | 0.1            | 0        | 15        | 10        |
|              | 0.25           | 2        | 10        | 20        |
|              | 0.5            | 3        | 9         | 20        |
|              | 1              | 2        | 10        | 20        |
|              | 2.5            | 2        | 10        | 21        |
| IQR          | 0.1            | 8        | 18        | 28        |
|              | 0.25           | 4        | 10        | 9         |
|              | 0.5            | 4        | 7         | 7         |
|              | 1              | 2        | 2         | 5         |
|              | 2.5            | 0        | 1         | 1         |
| CV (%)       | 0.1            | 200.0    | 76.6      | 120.0     |
|              | 0.25           | 115.5    | 51.6      | 26.5      |
|              | 0.5            | 76.6     | 36.0      | 20.2      |
|              | 1              | 40.8     | 11.5      | 12.7      |
|              | 2.5            | 0.0      | 5.1       | 2.8       |
| Accuracy (%) | 0.1            | -100.0   | 50.0      | -50.0     |
|              | 0.25           | 0.0      | 0.0       | 0.0       |
|              | 0.5            | 50.0     | -10.0     | 0.0       |
|              | 1              | 0.0      | 0.0       | -2.5      |
|              | 2.5            | 0.0      | 0.0       | 2.5       |
| Recovery (%) | 0.1            | 125      | 125       | 63        |
|              | 0.25           | 100      | 100       | 95        |
|              | 0.5            | 125      | 95        | 95        |
|              | 1              | 100      | 100       | 99        |
|              | 2.5            | 100      | 98        | 103       |

**Table S3.** Average, median, interquartile range (IQR), coefficient of variation (CV), accuracy and recovery of the concentration obtained from saltwater spikes in the concentrations of 2, 10 and 20 MP L<sup>-1</sup> depending on the volume sampled.

|              | <b>VOL (L)</b> | <b>2</b> | <b>10</b> | <b>20</b> |
|--------------|----------------|----------|-----------|-----------|
| Average      | 0.1            | 5        | 15        | 33        |
|              | 0.25           | 4        | 8         | 21        |
|              | 0.5            | 3        | 9         | 18        |
|              | 1              | 2        | 10        | 20        |
|              | 2.5            | 2        | 10        | 20        |
| Median       | 0.1            | 5        | 15        | 35        |
|              | 0.25           | 4        | 8         | 20        |
|              | 0.5            | 3        | 10        | 18        |
|              | 1              | 2        | 10        | 19        |
|              | 2.5            | 2        | 10        | 20        |
| IQR          | 0.1            | 10       | 25        | 18        |
|              | 0.25           | 6        | 6         | 17        |
|              | 0.5            | 4        | 6         | 9         |
|              | 1              | 1        | 4         | 3         |
|              | 2.5            | 1        | 1         | 2         |
| CV (%)       | 0.1            | 115.5    | 86.1      | 29.5      |
|              | 0.25           | 81.6     | 40.8      | 42.2      |
|              | 0.5            | 76.6     | 38.5      | 27.2      |
|              | 1              | 38.5     | 18.3      | 8.9       |
|              | 2.5            | 22.2     | 4.9       | 4.1       |
| Accuracy (%) | 0.1            | 150.0    | 50.0      | 75.0      |
|              | 0.25           | 100.0    | -20.0     | 0.0       |
|              | 0.5            | 50.0     | 0.0       | -10.0     |
|              | 1              | -25.0    | 0.0       | -5.0      |
|              | 2.5            | 0.0      | 0.0       | 0.0       |
| Recovery (%) | 0.1            | 250      | 150       | 163       |
|              | 0.25           | 200      | 80        | 105       |
|              | 0.5            | 125      | 90        | 90        |
|              | 1              | 75       | 100       | 98        |
|              | 2.5            | 112.5    | 103       | 100       |

**Table S4.** Average, median and interquartile range (IQR) of the concentrations obtained for the environmental samples obtained for Aveiro lagoon and Vouga river, depending on the volume filtered and, on the observation conditions (470 nm, 254 nm all, 254 nm red).

|         | Vol (L) | AVEIRO LAGOON |        |         | VOUGA RIVER |        |         |
|---------|---------|---------------|--------|---------|-------------|--------|---------|
|         |         | 470 nm        | 254 nm | 254 red | 470 nm      | 254 nm | 254 red |
| Average | 0.10    | 48            | 5      | 5       | 10          | 5      | 3       |
|         | 0.25    | 43            | 11     | 2       | 6           | 2      | 0       |
|         | 0.50    | 15            | 5      | 1       | 6           | 2      | 1       |
|         | 1.00    | 18            | 4      | 1       | 1           | 1      | 0       |
|         | 2.50    | 11            | 2      | 1       | 1           | 0      | 0       |
|         | 5.00    | 12            | 1      | 0       | -           | -      | -       |
| Median  | 0.10    | 45            | 5      | 5       | 5           | 5      | 0       |
|         | 0.25    | 48            | 12     | 2       | 6           | 2      | 0       |
|         | 0.50    | 15            | 5      | 0       | 5           | 2      | 0       |
|         | 1.00    | 18            | 4      | 1       | 1           | 1      | 0       |
|         | 2.50    | 11            | 2      | 0       | 1           | 0      | 0       |
|         | 5.00    | 13            | 1      | 0       | -           | -      | -       |
| IQR     | 0.10    | 33            | 10     | 10      | 25          | 10     | 8       |
|         | 0.25    | 29            | 9      | 4       | 10          | 4      | 0       |
|         | 0.50    | 25            | 9      | 2       | 8           | 2      | 2       |
|         | 1.00    | 10            | 2      | 2       | 1           | 1      | 1       |
|         | 2.50    | 2             | 4      | 1       | 1           | 0      | 0       |
|         | 5.00    | 8             | 0      | 1       | -           | -      | -       |

What is the minimum volume of sample to find small microplastics: Laboratory experiments and sampling of Aveiro Lagoon and Vouga River, Portugal

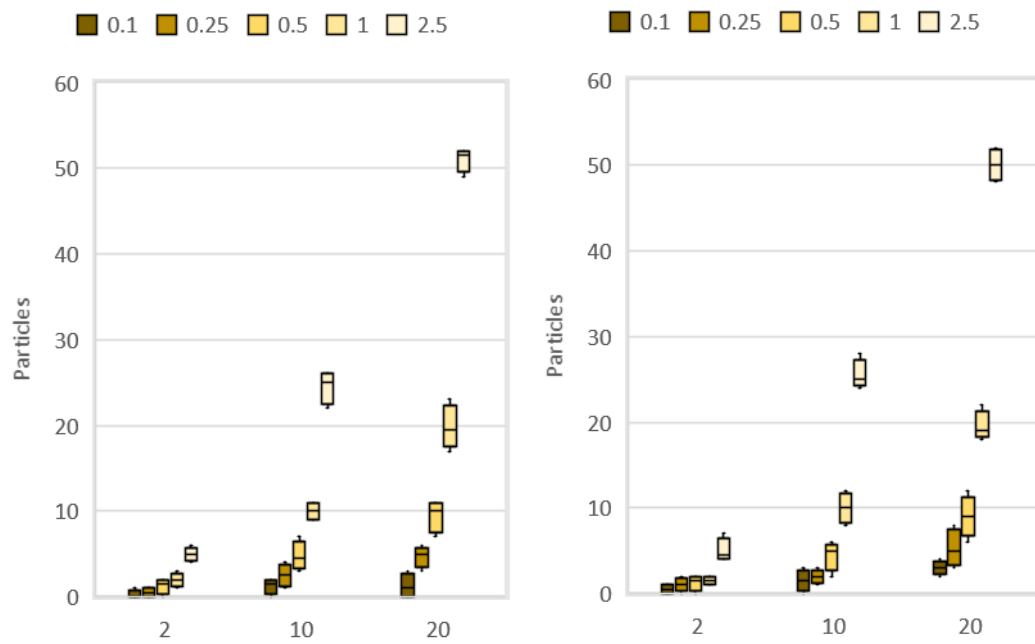

**Figure S3.** Number of particles obtained in laboratory spiked samples for freshwater (left) and saltwater (right), under three spiked concentrations (2, 10, 20 MP L<sup>-1</sup>), depending on volume sampled (0.1, 0.25, 0.5, 1, 2.5 L).

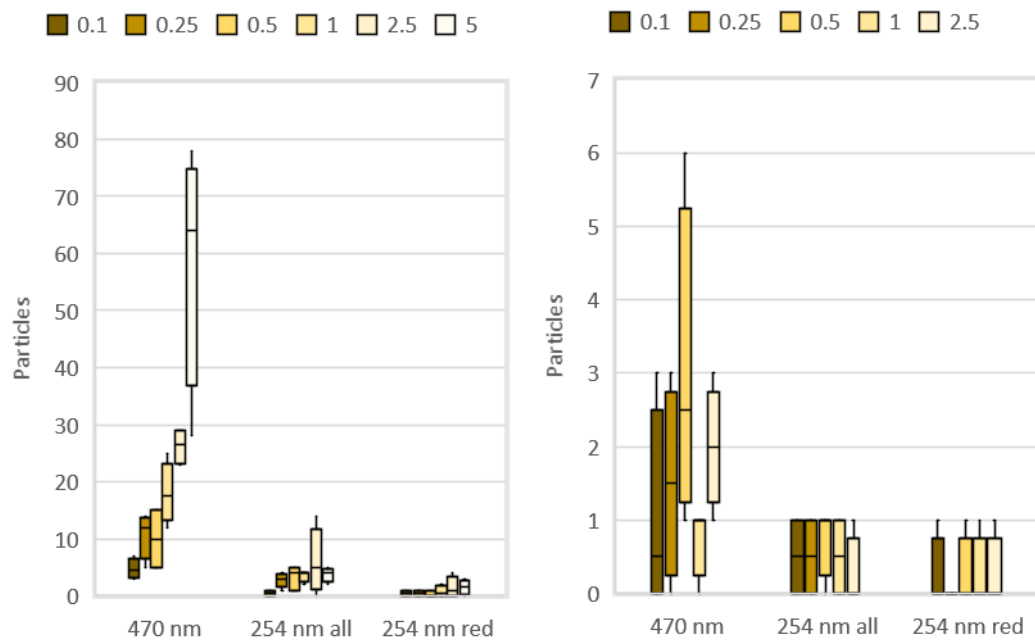

**Figure S4.** Number of particles obtained in environmental samples for Vouga river (left) and Aveiro lagoon (right), under three conditions (470 nm, 254 nm all particles, 254 nm red particles), depending on volume sampled (0.1, 0.25, 0.5, 1, 2.5, 5 L).
